# Supplementary material for: The Organization of Outreach Work for Vulnerable Patients in General Practice during COVID-19: Results from the Cross-Sectional PRICOV-19 Study in 38 Countries
Source: MDPI journal article supplement (doi:10.3390/ijerph20043165), 2023-02-10
Supplement: s1 [file s1]

## Supplementary Material

**Supplementary Table S1: An overview of the country characteristics**

| Country                | Per million population                                                |                                                              | Availability of a patient list system/registration with a GP |
|------------------------|-----------------------------------------------------------------------|--------------------------------------------------------------|--------------------------------------------------------------|
|                        | Confirmed COVID-19 cases in 3 months before data collection commenced | COVID-19 deaths in 3 months before data collection commenced |                                                              |
| Austria                | 33674                                                                 | 729                                                          | No                                                           |
| Belgium                | 42284                                                                 | 580                                                          | No                                                           |
| Bosnia and Herzegovina | 20735                                                                 | 632                                                          | Yes                                                          |
| Bulgaria               | 23878                                                                 | 1123                                                         | Yes                                                          |
| Croatia                | 27349                                                                 | 898                                                          | Yes                                                          |
| Cyprus                 | 27199                                                                 | 204                                                          | Yes                                                          |
| Czech Rep              | 46452                                                                 | 734                                                          | No                                                           |
| Denmark                | 22233                                                                 | 261                                                          | Yes                                                          |
| Estonia                | 7480                                                                  | 41                                                           | Yes                                                          |
| Finland                | 3023                                                                  | 11                                                           | Yes                                                          |
| France                 | 22642                                                                 | 488                                                          | No                                                           |
| Germany                | 20039                                                                 | 556                                                          | No                                                           |
| Greece                 | 11568                                                                 | 429                                                          | No                                                           |
| Hungary                | 42623                                                                 | 1553                                                         | Yes                                                          |
| Iceland                | 3015                                                                  | 46                                                           | Yes                                                          |
| Ireland                | 27001                                                                 | 279                                                          | Yes                                                          |
| Israel                 | 23467                                                                 | 205                                                          | No                                                           |
| Italy                  | 29648                                                                 | 633                                                          | Yes                                                          |
| Kosovo*                | 19909                                                                 | 396                                                          | No                                                           |
| Latvia                 | 20909                                                                 | 320                                                          | Yes                                                          |
| Lithuania              | 62027                                                                 | 986                                                          | Yes                                                          |
| Luxemburg              | 11537                                                                 | 27                                                           | No                                                           |
| Malta                  | 22711                                                                 | 393                                                          | No                                                           |
| Moldova                | 20681                                                                 | 407                                                          | Yes                                                          |
| Netherlands            | 36082                                                                 | 383                                                          | Yes                                                          |
| North Macedonia        | 28624                                                                 | 955                                                          | No                                                           |
| Norway                 | 6297                                                                  | 53                                                           | Yes                                                          |
| Poland                 | 26879                                                                 | 637                                                          | Yes                                                          |
| Portugal               | 33171                                                                 | 485                                                          | Yes                                                          |
| Romania                | 20220                                                                 | 400                                                          | Yes                                                          |
| Serbia                 | 50478                                                                 | 465                                                          | Yes                                                          |
| Slovenia               | 35065                                                                 | 626                                                          | Yes                                                          |
| Spain                  | 33318                                                                 | 480                                                          | Yes                                                          |
| Sweden                 | 39030                                                                 | 605                                                          | Yes                                                          |
| Switzerland            | 25708                                                                 | 557                                                          | No                                                           |
| Turkey                 | 23901                                                                 | 172                                                          | Yes                                                          |
| Ukraine                | 14452                                                                 | 346                                                          | No                                                           |
| United Kingdom         | 8521                                                                  | 307                                                          | Yes                                                          |

**Supplementary Material 2: The results of the linear mixed model analyses with outreach work as outcome variable on the database with complete data**

|                                                                                 | Model I:<br>empty model<br>Coefficient (SE) |            | Model II:<br>practice structure<br>Coefficient (SE) |            | Model III: burden and<br>availability of support<br>Coefficient (SE) |            | Model IV:<br>Country characteristics<br>Coefficient (SE) <sup>a</sup> |         |
|---------------------------------------------------------------------------------|---------------------------------------------|------------|-----------------------------------------------------|------------|----------------------------------------------------------------------|------------|-----------------------------------------------------------------------|---------|
| <i>Fixed part</i>                                                               |                                             |            |                                                     |            |                                                                      |            |                                                                       |         |
| Constant                                                                        | 0.363                                       | (0.034)*** | 0.346                                               | (0.035)*** | 0.335                                                                | (0.036)*** |                                                                       |         |
| Practice staff size                                                             |                                             |            |                                                     |            |                                                                      |            |                                                                       |         |
| Number of paid staff members                                                    |                                             |            | 0.000                                               | (0.000)    | 0.000                                                                | (0.000)    |                                                                       |         |
| GP trainee teaching practice (ref. no)                                          |                                             |            |                                                     |            |                                                                      |            |                                                                       |         |
| Being a teaching practice: yes                                                  |                                             |            | 0.011                                               | (0.008)    | 0.008                                                                | (0.008)    |                                                                       |         |
| Patient population composition<br>(ref. approximately average)                  |                                             |            |                                                     |            |                                                                      |            |                                                                       |         |
| Patients with chronic conditions:<br>below average                              |                                             |            | 0.017                                               | (0.018)    | 0.018                                                                | (0.018)    |                                                                       |         |
| Patients with chronic conditions:<br>above average                              |                                             |            | 0.008                                               | (0.008)    | 0.007                                                                | (0.008)    |                                                                       |         |
| Patients with financial problems:<br>below average                              |                                             |            | 0.010                                               | (0.010)    | 0.010                                                                | (0.010)    |                                                                       |         |
| Patients with financial problems:<br>above average                              |                                             |            | 0.005                                               | (0.010)    | 0.005                                                                | (0.010)    |                                                                       |         |
| Patients with a psychiatric vulnerability:<br>below average                     |                                             |            | 0.008                                               | (0.011)    | 0.008                                                                | (0.011)    |                                                                       |         |
| Patients with a psychiatric vulnerability:<br>above average                     |                                             |            | 0.013                                               | (0.010)    | 0.012                                                                | (0.010)    |                                                                       |         |
| Burden                                                                          |                                             |            |                                                     |            |                                                                      |            |                                                                       |         |
| Increased responsibilities since COVID-19                                       |                                             |            |                                                     |            | 0.006                                                                | (0.004)    |                                                                       |         |
| Availability of support (ref. no)                                               |                                             |            |                                                     |            |                                                                      |            |                                                                       |         |
| Availability of administrative assistant or<br>practice manager: yes            |                                             |            |                                                     |            | 0.018                                                                | (0.009)*   |                                                                       |         |
| Availability of paramedical support staff: yes                                  |                                             |            |                                                     |            | 0.008                                                                | (0.011)    |                                                                       |         |
| Capitation payment model: yes                                                   |                                             |            |                                                     |            | -0.006                                                               | (0.011)    |                                                                       |         |
| Intensity of COVID-19 in 3 months before<br>country-specific study commencement |                                             |            |                                                     |            |                                                                      |            |                                                                       |         |
| COVID-19 cases per million population                                           |                                             |            |                                                     |            |                                                                      |            | -0.000                                                                | (0.000) |
| COVID-19 mortality per million population                                       |                                             |            |                                                     |            |                                                                      |            | 0.000                                                                 | (0.000) |
| Patient list system (ref. no)                                                   |                                             |            |                                                     |            |                                                                      |            |                                                                       |         |
| Availability of patient list system/<br>patient registration with a GP: yes     |                                             |            |                                                     |            |                                                                      |            | 0.052                                                                 | (0.073) |
| <i>Random part</i>                                                              |                                             |            |                                                     |            |                                                                      |            |                                                                       |         |
| Country variance                                                                | 0.043                                       | (0.010)    | 0.042                                               | (0.010)    | 0.042                                                                | (0.010)    |                                                                       |         |
| Practice variance                                                               | 0.046                                       | (0.001)    | 0.046                                               | (0.001)    | 0.046                                                                | (0.001)    |                                                                       |         |
| ICC (%)                                                                         | 48.3                                        |            | 47.7                                                |            | 47.7                                                                 |            |                                                                       |         |

\* p<0.05; \*\* p<0.01; \*\*\*p<0.001; ICC= intra-class correlation; <sup>a</sup>The explanatory variables on country level have been added one by one due to the relatively small number of countries; coefficients of practice level variables are not reported – they differ only marginally from those in Model III.
